# Supplementary material for: Simplified Procedure for General Synthesis of Monosubstituted Piperazines—From a Batch Reaction Vessel to a Flow (Microwave) Reactor
Source: MDPI journal article supplement (doi:10.3390/molecules25092168), 2020-05-06

Sample name: **MP0003**

Summary formula: **C<sub>8</sub>H<sub>17</sub>ClN<sub>2</sub>O<sub>2</sub>**

LC:

**Agilent 1200 HPLC System**

Chromatographic column: Phenomenex Luna Omega PS C18, 150 x 4.6 mm, 3µm

Flow rate: 1 mL/min

Injection volume: 2 µL of aqueous sample (c = 100 µg/mL)

Gradient elution:

|             |                                                |
|-------------|------------------------------------------------|
| 0 – 13 min  | 100 – 85% 30 mM ammonium acetate (0 – 15% ACN) |
| 13 – 16 min | 85 – 35% 30 mM ammonium acetate (15 – 65% ACN) |
| 16 – 17 min | 35 – 0% 30 mM ammonium acetate (65 - 100% ACN) |

MS:

**Agilent 6224 Accurate-Mass TOF mass spectrometer**

MS conditions: APCI positive, N<sub>2</sub> flow 7 L/min, gas temperature 325°C, nebulizer 45 psig, vaporizer 200°C, fragmentor 20 V

**[C<sub>8</sub>H<sub>17</sub>N<sub>2</sub>O<sub>2</sub>]<sup>+</sup> = 173.1285**

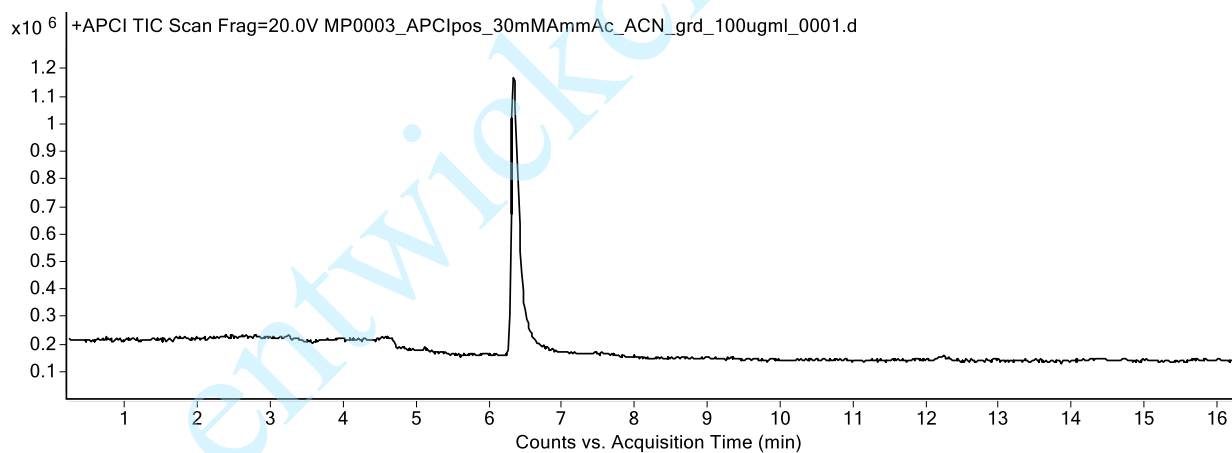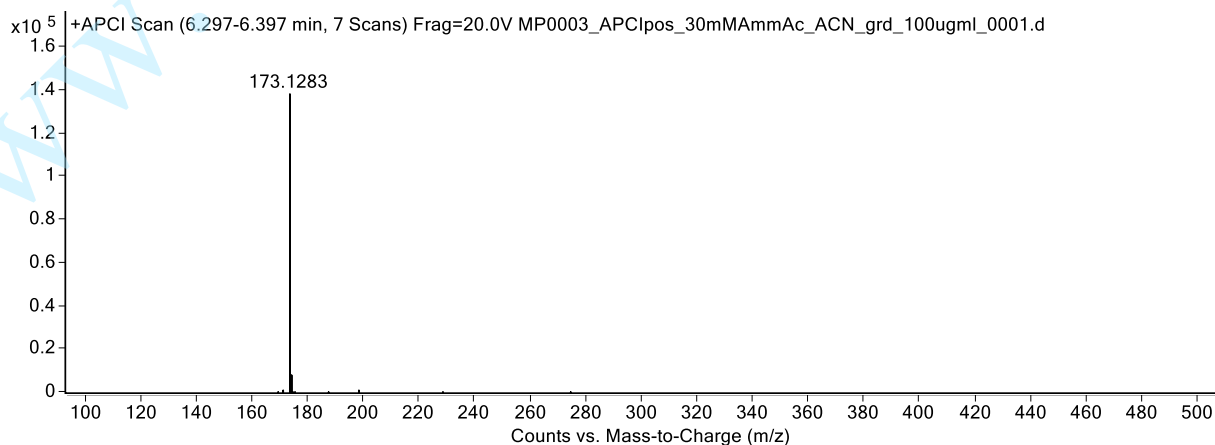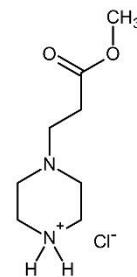

Supplement: s1 [file s1]
