# Supplementary material for: Simplified Procedure for General Synthesis of Monosubstituted Piperazines—From a Batch Reaction Vessel to a Flow (Microwave) Reactor
Source: MDPI journal article supplement (doi:10.3390/molecules25092168), 2020-05-06

**Sample name:** MP0009

**Summary formula:**  $C_{11}H_{16}ClFN_2$

**LC:**

**Agilent 1200 HPLC System**

Chromatographic column: Phenomenex Luna Omega PS C18, 150 x 4.6 mm, 3 $\mu$ m

Flow rate: 1 mL/min

Injection volume: 2  $\mu$ L of aqueous sample (c = 50  $\mu$ g/mL)

Gradient elution: 0 – 10 min 100 – 35% 30 mM ammonium acetate (0 – 65% ACN)  
10 – 11 min 35 – 0% 30 mM ammonium acetate (65 – 100% ACN)

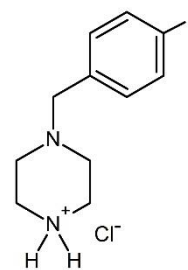

**MS:**

**Agilent 6224 Accurate-Mass TOF mass spectrometer**

MS conditions: APCI positive,  $N_2$  flow 7 L/min, gas temperature 325°C, nebulizer 45 psig, vaporizer 200°C, fragmentor 20 V

$[C_{11}H_{16}FN_2]^+ = 195.1292$

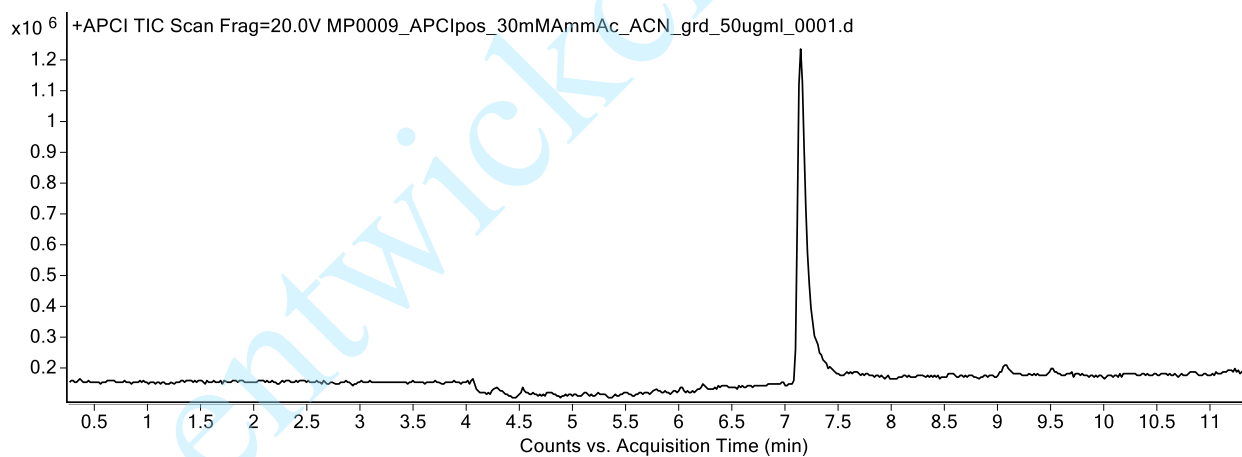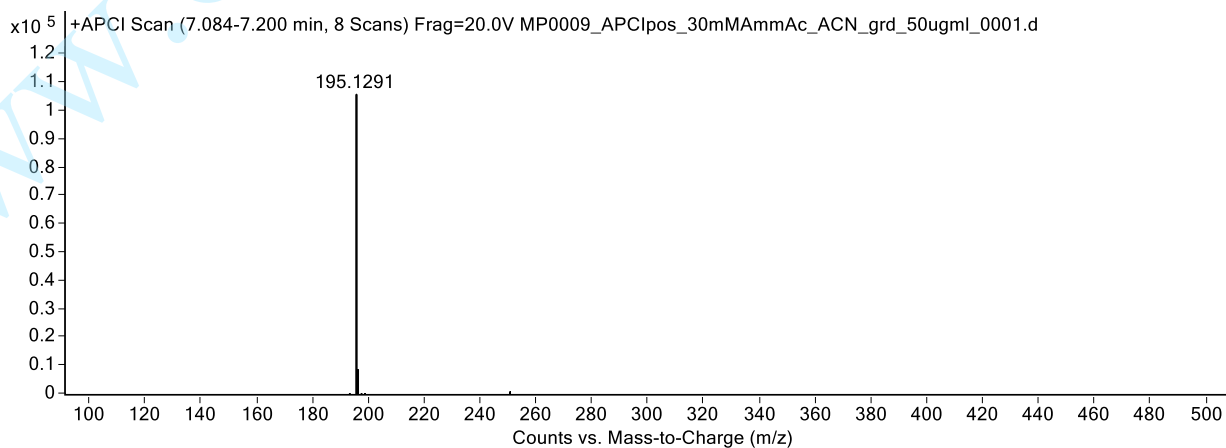

Supplement: s1 [file s1]
